# Supplementary material for: cylcop: An R Package for Circular-Linear Copulae with Angular Symmetry
Source: bioRxiv or medRxiv preprint supplement (doi:10.1101/2021.07.14.452253), 2021-10-01
Supplement: Supplementary file [file media-1.pdf]

# Appendix of Cylcop: An R package for Circular-linear Copulae with Angular Symmetry

Florian Hodel, John Fieberg

## Contents

|                                             |          |
|---------------------------------------------|----------|
| <b>A1</b> Wrapped Cauchy Distribution       | <b>1</b> |
| <b>A2</b> von Mises Copula                  | <b>2</b> |
| <b>A3</b> Copula with Quadratic Sections    | <b>5</b> |
| <b>A4</b> Copula with Cubic Sections        | <b>6</b> |
| <b>A5</b> Rectangular Patchwork Copula      | <b>6</b> |
| <b>A6</b> Perfect correlation               | <b>7</b> |
| <b>A7</b> Copulae in <code>opt_auto</code>  | <b>8</b> |
| <b>A8</b> Non-parameteric Density Estimates | <b>9</b> |

## A1 Wrapped Cauchy Distribution

The implementation of the wrapped Cauchy distribution in the `circular`-package does not allow for the calculation of the distribution function or the quantile function. Therefore, we use a numerical approximation implemented in the `Wrapped`-package. However, this package uses a different parametrization than then `circular`-package. The equation for the wrapped Cauchy probability density with the parametrization of the `Wrapped`-package is

$$\begin{aligned}
f(\theta; \mu, \gamma) &= \frac{1}{2\pi} \frac{\sinh(\gamma)}{\cosh(\gamma) - \cos(\theta - \mu)} \\
&= \frac{1}{2\pi} \frac{0.5(\exp(\gamma) - \exp(-\gamma))}{0.5(\exp(\gamma) + \exp(-\gamma)) - \cos(\theta - \mu)} \\
&= \frac{1}{2\pi} \frac{\exp(\gamma) - \exp(-\gamma)}{\exp(\gamma) + \exp(-\gamma) - 2 \cos(\theta - \mu)} \\
&= \frac{1}{2\pi} \frac{[\exp(-\gamma)]^{-1} - \exp(-\gamma)}{[\exp(-\gamma)]^{-1} + \exp(-\gamma) - 2 \cos(\theta - \mu)} \\
&= \frac{1}{2\pi} \frac{[\exp(-\gamma)]^{-1} (1 - [\exp(-\gamma)]^2)}{[\exp(-\gamma)]^{-1} (1 + [\exp(-\gamma)]^2 - 2 \exp(-\gamma) \cos(\theta - \mu))} \\
&= \frac{1}{2\pi} \frac{1 - [\exp(-\gamma)]^2}{1 + [\exp(-\gamma)]^2 - 2 \exp(-\gamma) \cos(\theta - \mu)} \\
&= \frac{1}{2\pi} \frac{1 - \rho^2}{1 + \rho^2 - 2\rho \cos(\theta - \mu)} \\
&= f(\theta; \mu, \rho)
\end{aligned} \tag{1}$$

The last equality is in the parametrization of the wrapped Cauchy density of the circular-package. The relationship between the two parametrizations is  $\rho = \exp(-\gamma)$ .

## A2 von Mises Copula

### A2.1 PDF

We need to show that  $c(u, v) = 2\pi g(2\pi[u - v])$  is indeed a circular-linear copula. As in the main text, we will assume the vonMises density  $g$  to have as support the entire real line. First of all, note that the function  $g$  is not exactly the vonMises density  $f$ . It is the same formula, but its support is  $[2\pi(0 - 1), 2\pi(1 - 0)] = [-2\pi, 2\pi]$ . The equation for the PDF of the vonMises copula is

$$\begin{aligned}
f_{\Theta, X}(\theta, x) &= c(F_{\Theta}(\theta), F_X(x)) f_{\Theta}(\theta) f_X(x) \\
&= 2\pi g(2\pi[F_{\Theta}(\theta) - F_X(x)]) f_{\Theta}(\theta) f_X(x) \quad \theta \in [-\pi, \pi], x \in \mathbb{R}.
\end{aligned} \tag{2}$$

When integrating with respect to either  $\theta$  or  $x$  we must get back the corresponding (other) marginal distribution

$$\begin{aligned}
\int_{-\infty}^{\infty} f_{\Theta, X}(\theta, x) &= 2\pi \int_{-\infty}^{\infty} g(2\pi[F_{\Theta}(\theta) - F_X(x)] \mid \mu = \mu_0) f_{\Theta}(\theta) f_X(x) dx \\
&= f_{\Theta}(\theta) \int_0^{2\pi} g(2\pi[F_{\Theta}(\theta) - q \mid \mu = \mu_0] dq \\
&= f_{\Theta}(\theta) \int_0^{2\pi} g(-q \mid \mu = \mu_0 - 2\pi F_{\Theta}(\theta)) dq \tag{3} \\
&= f_{\Theta}(\theta) \int_0^{2\pi} g(q \mid \mu = 2\pi F_{\Theta}(\theta) - \mu_0) dq \\
&= f_{\Theta}(\theta).
\end{aligned}$$

In the second step, we made the substitution  $q = 2\pi F_X(x)$ ,  $dx = \frac{dq}{2\pi f_X(x)}$ , and the second-to-last step is for symmetry reasons. Next, it is trivial to show with the properties of  $g$  that the copula and the joint density function are periodic in the first argument.

$$\begin{aligned}
\lim_{\theta \rightarrow \pi} f_{\Theta, X}(\theta, x) &= 2\pi g(2\pi[1 - F_X(x)] \mid \mu = \mu_0) \lim_{\theta \rightarrow \pi} f(\theta) f_X(x) \\
&= 2\pi g(2\pi - 2\pi F_X(x) \mid \mu = \mu_0) f(-\pi) f_X(x) \\
&= 2\pi g(2\pi[0 - F_X(x)] \mid \mu = \mu_0 - 2\pi) f(-\pi) f_X(x) \tag{4} \\
&= 2\pi g(2\pi[0 - F_X(x)] \mid \mu = \mu_0) f(-\pi) f_X(x) \\
&= f_{\Theta, X}(-\pi, x)
\end{aligned}$$

## A2.2 Derivation of the CDF with Bessel Functions

With the two substitutions  $q = 2\pi F_X(x)$ ,  $dx = \frac{dq}{2\pi f_X(x)}$  and  $r = 2\pi F_\Theta(\theta)$ ,  $d\theta = \frac{dq}{2\pi f_\Theta(\theta)}$  we can write

$$\begin{aligned}
F_{\Theta, X}(a, b) &= \int_{-\infty}^b \int_{-\infty}^a f_{\Theta, X}(\theta, x) d\theta dx \\
&= 2\pi \int_{-\infty}^a \int_{-\infty}^b g(2\pi[F_\Theta(\theta) - F_X(x)] \mid \mu = \mu_0) f_\Theta(\theta) f_X(x) dx d\theta \\
&= \frac{1}{2\pi} \int_0^{2\pi F_\Theta(a)} \int_0^{2\pi F_X(b)} g(q \mid \mu = r - \mu_0) dq dr \\
&= \frac{1}{2\pi} \int_0^{2\pi F_\Theta(a)} \int_0^{2\pi F_X(b)} \frac{1}{2\pi} \left( 1 + \frac{2}{I_0(\kappa)} \sum_{j=1}^{\infty} I_j(\kappa) \cos[j(q + \mu_0 - r)] \right) dq dr \\
&= \frac{1}{2\pi} \int_0^{2\pi F_\Theta(a)} \frac{1}{2\pi} \left( 2\pi F_X(b) + \frac{2}{I_0(\kappa)} \sum_{j=1}^{\infty} I_j(\kappa) \frac{\sin[j(2\pi F_X(b) + \mu_0 - r)]}{j} \right. \\
&\quad \left. - \frac{2}{I_0(\kappa)} \sum_{j=1}^{\infty} I_j(\kappa) \frac{\sin[j(\mu_0 - r)]}{j} \right) dr \\
&= \frac{1}{2\pi} \int_0^{2\pi F_\Theta(a)} \left( F_X(b) + \frac{1}{\pi I_0(\kappa)} \sum_{j=1}^{\infty} I_j(\kappa) \frac{\sin[j(2\pi F_X(b) + \mu_0 - r)] - \sin[j(\mu_0 - r)]}{j} \right) dr \\
&= \frac{1}{2\pi} \left( 2\pi F_\Theta(a) F_X(b) + \frac{1}{\pi I_0(\kappa)} \sum_{j=1}^{\infty} I_j(\kappa) \frac{\cos[j(2\pi F_\Theta(a) - 2\pi F_X(b) - \mu_0)] - \cos[j(2\pi F_\Theta(a) - \mu_0)]}{j^2} \right. \\
&\quad \left. - \frac{1}{\pi I_0(\kappa)} \sum_{j=1}^{\infty} I_j(\kappa) \frac{\cos[j(-2\pi F_X(b) - \mu_0)] - \cos[-j\mu_0]}{j^2} \right) \\
&= F_\Theta(a) F_X(b) + \frac{1}{2\pi^2 I_0(\kappa)} \sum_{j=1}^{\infty} I_j(\kappa) \left( \frac{\cos[j(2\pi F_\Theta(a) - 2\pi F_X(b) - \mu_0)] - \cos[j(2\pi F_\Theta(a) - \mu_0)]}{j^2} \right. \\
&\quad \left. + \frac{-\cos[j(-2\pi F_X(b) - \mu_0)] + \cos[-j\mu_0]}{j^2} \right)
\end{aligned} \tag{5}$$

### A3 Copula with Quadratic Sections

As stated in the main text, the 4 necessary and sufficient conditions for a function

$$C(u, v) = uv + \psi(u)v(1 - v). \quad (6)$$

to be a copula with a density that is periodic in  $u$  are

1.  $\psi(u)$  is absolutely continuous on  $[0, 1]$ .
2.  $|\psi'(u)| \leq 1$  a.e. on  $[0, 1]$ .
3.  $|\psi(u)| \leq \min(u, 1 - u) \quad \forall u \in [0, 1]$ .
4.  $\psi'(u)$  must be periodic on  $[0, 1]$ .

We have chosen  $\psi'(u) = a2\pi \cos(2\pi u)$ , which fulfills property 2 and 3 only for certain values of  $a$ :  $|\psi'(u)| \leq 1$  holds for  $-1/2\pi \leq a \leq 1/2\pi$ . The third property can be rewritten:

$$\begin{aligned} \frac{d}{du} a \sin(2\pi u) &\leq \begin{cases} \frac{d}{du} \min(u, 1 - u), & 0 \leq u < 0.5 \\ -\frac{d}{du} \min(u, 1 - u), & 0.5 < u \leq 1 \end{cases} \\ &= a2\pi \cos(2\pi u) \leq \begin{cases} 1, & 0 \leq u < 0.5 \\ 1, & 0.5 < u \leq 1 \end{cases} \end{aligned} \quad (7)$$

and is therefore also satisfied when

$$-1/2\pi \leq a \leq 1/2\pi \quad (8)$$

## A4 Copula with Cubic Sections

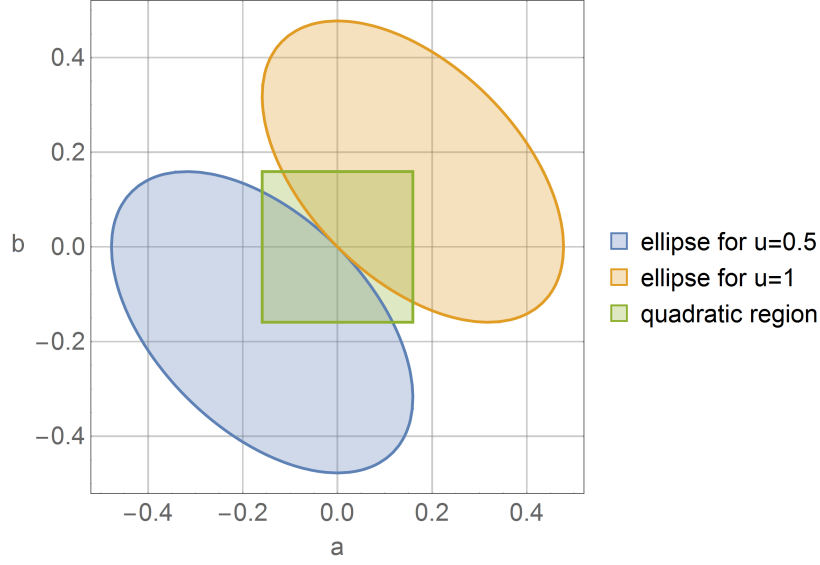

Figure A1: The set of permissible values of parameters  $a$  and  $b$  is the union of the square and the intersection of the ellipses (i.e. the square).

## A5 Rectangular Patchwork Copula

We can derive the density by taking the derivatives of the CDF with respect to  $u$  and  $v$ . First for  $(u, v) \in R_1$ :

$$\begin{aligned}
 c_{patch}(u, v) &= \frac{\partial^2}{\partial u \partial v} C_{patch}(u, v) \\
 &= \frac{\partial^2}{\partial u \partial v} \lambda_1 C_1(\psi_u(u), \psi_v(v)) + C_{bg}(u_1, v) \\
 &= \lambda_1 \psi'_u(u) \psi'_v(v) c_1(\psi_u(u), \psi_v(v))
 \end{aligned} \tag{9}$$

where we defined  $\psi_u(u) = \frac{V_{C_{bg}}([u_1, u] \times [0, 1])}{\lambda_1}$  and  $\psi_v(v) = \frac{V_{C_{bg}}([u_1, u_2] \times [0, v])}{\lambda_1}$ . We now have to find the derivatives of these two functions:

$$\begin{aligned}
\psi'_u(u) &= \frac{d}{du} \psi_u(u) \\
&= \frac{1}{\lambda_1} \frac{d}{du} \left( C_{bg}(u_1, 0) + C_{bg}(u, 1) - C_{bg}(u_1, 1) - C_{bg}(u, 0) \right) \\
&= \frac{1}{\lambda_1} \frac{d}{du} u \\
&= \frac{1}{\lambda_1}
\end{aligned} \tag{10}$$

$$\begin{aligned}
\psi'_v(v) &= \frac{d}{dv} \psi_v(v) \\
&= \frac{1}{\lambda_1} \frac{d}{dv} \left( C_{bg}(u_1, 0) + C_{bg}(u_2, v) - C_{bg}(u_1, v) - C_{bg}(u_2, 0) \right) \\
&= \frac{1}{\lambda_1} \frac{d}{dv} \left( C_{bg}(u_2, v) - C_{bg}(u_1, v) \right) \\
&= \frac{1}{\lambda_1} \left( \int_0^{u_2} c_{bg}(x, v) dx - \int_0^{u_1} c_{bg}(x, v) dx \right) \\
&= \frac{1}{\lambda_1} \int_{u_1}^{u_2} c_{bg}(x, v) dx
\end{aligned} \tag{11}$$

With similar calculations for  $R_2$  we finally arrive at

$$c_{patch}(u, v) = \begin{cases} \frac{1}{\lambda_1} \left( \int_{u_1}^{u_2} c_{bg}(x, v) dx \right) c_1 \left( \frac{V_{C_{bg}}([u_1, u] \times [0, 1])}{\lambda_1}, \frac{V_{C_{bg}}([u_1, u_2] \times [0, v])}{\lambda_1} \right) & \text{if } (u, v) \in R_1 \\ \frac{1}{\lambda_2} \left( \int_{1-u_2}^{1-u_1} c_{bg}(x, v) dx \right) \\ \times c_1 \left( 1 - \frac{V_{C_{bg}}([1-u_2, u] \times [0, 1])}{\lambda_2}, \frac{V_{C_{bg}}([1-u_2, 1-u_1] \times [0, v])}{\lambda_2} \right) & \text{if } (u, v) \in R_2 \\ c_{bg}(u, v) & \text{otherwise} \end{cases} \tag{12}$$

## A6 Perfect correlation

We obtained samples from a circular-linear, symmetric copula with perfect correlation using

```
sample <- rCopula(1000000, cyl_rect_combine(normalCopula(1)))
```

These draws are shown in panel a of figure A2. When we calculate the circular-linear correlation coefficient of this sample (which consists of points along the lines  $u = v/2$  and  $u = 1 - v/2$ ), we will obtain a value close to 1. The same is, however, not true for the normalized mutual information. Therefore, we have included the argument `symmetrize` in the function `mi_cyl`. If `symmetrize=TRUE`, the empirical copula is calculated from the data and all  $u$ -values larger than 0.5 are set to  $1 - 0.5$ . The result of `mi_cyl` is then approximately 1 (for computational reasons it is actually only exactly 1 with very large sample sizes), in the case of perfect correlation (see panel b of figure A2).

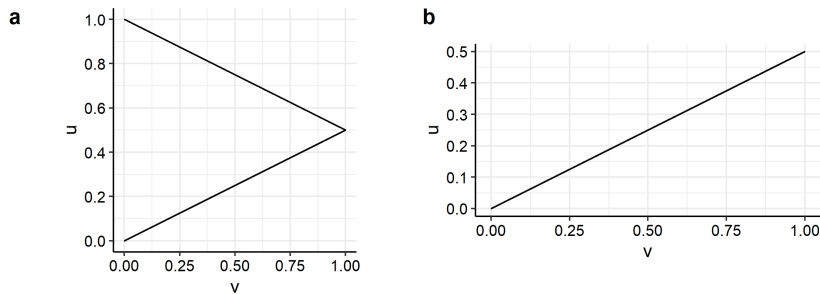

Figure A2: Left: draws from a circular-linear, symmetric copula with perfect correlation. Right:  $u$ -values larger than 0.5 of those draws are set to  $1-0.5$ .

## A7 Copulae in `opt_auto`

The copulae that are fit to the data when using the `opt_auto` function are

- `cyl_vonmises(flip = F)`
- `cyl_vonmises(flip = T)`
- `cyl_quadsec()`
- `cyl_cubsec()`
- `cyl_rot_combine(frankCopula(), shift = F)`
- `cyl_rot_combine(claytonCopula(), shift = F)`
- `cyl_rot_combine(gumbelCopula(), shift = F)`
- `cyl_rot_combine(frankCopula(), shift = T)`
- `cyl_rot_combine(claytonCopula(), shift = T)`



- `cyl_rot_combine(gumbelCopula(), shift = T)`
- `cyl_rect_combine(copula = frankCopula(), low_rect = c(0, 0.5), up_rect = "symmetric"), flip_up = T`
- `cyl_rect_combine(copula = claytonCopula(), low_rect = c(0, 0.5), up_rect = "symmetric"), flip_up = T`
- `cyl_rect_combine(copula = gumbelCopula(), low_rect = c(0, 0.5), up_rect = "symmetric"), flip_up = T`
- `cyl_rect_combine(copula = claytonCopula(), low_rect = c(0, 0.5), up_rect = "symmetric"), flip_up = F`
- `cyl_rect_combine(copula = gumbelCopula(), low_rect = c(0, 0.5), up_rect = "symmetric"), flip_up = F`

The rectangular patchwork copula based on the Frank copula with parameter  $\alpha$  and `flip_up = F` is the same as a rectangular patchwork copula based on the Frank copula with parameter  $-\alpha$  and `flip_up = T` and is therefore omitted from the list.

## A8 Non-parametric Density Estimates

We calculated non-parametric density estimates of angles drawn from a mixed von Mises distribution with parameters  $\mu_1 = 0$ ,  $\mu_2 = \pi$ ,  $\kappa_1 = 2$ ,  $\kappa_2 = 1$ , and `prop = 0.7`. As bandwidth, we used 13.6 (result of `cylcop::opt_circ_bw(theta = traj$angle, loss="adhoc", kappa.est="ML")`) and 43.2 (result of `cylcop::opt_circ_bw(theta = traj$angle, loss="adhoc", kappa.est="trigmoments")`).

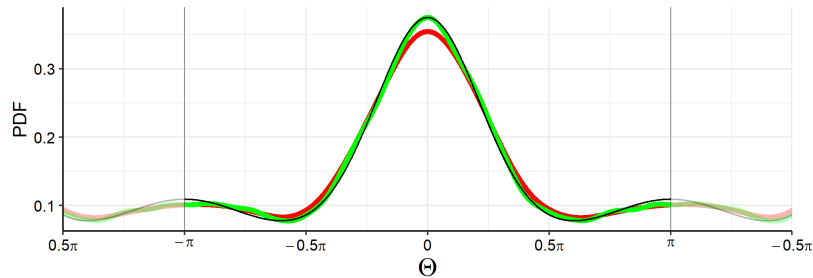

Figure A3: Black: true mixed von Mises density, red: non-parametric density estimate obtained with bandwidth 13.6, green: non-parametric density estimate obtained with bandwidth 43.2.
